# Supplementary material for: Macroscale superlubricity enabled by rationally designed MoS2-based superlattice films
Source: Research Square preprint supplement (doi:10.21203/rs.3.rs-1356825/v1), 2022-02-22
Supplement: Supplementary file 1 [file 1cc8bd4f8c1b8dacb283eb4f.docx]

Supplementary Information for

Macroscale superlubricity enabled by rationally designed MoS2-based superlattice films

Siming Ren1, Mingjun Cui2, Ashlie Martini3, Yanbin Shi1, Haixin Wang1, Jibin Pu1, Qunyang Li4,5🖂 & Liping Wang1🖂

Corresponding authors. 🖂email: qunyang@tsinghua.edu.cn; wangliping@nimte.ac.cn

The supplementary information includes:

Supplementary Figures 1-15

Supplementary Tables 1 and 2

Supplementary Notes 1-3

**Supplementary Figures**


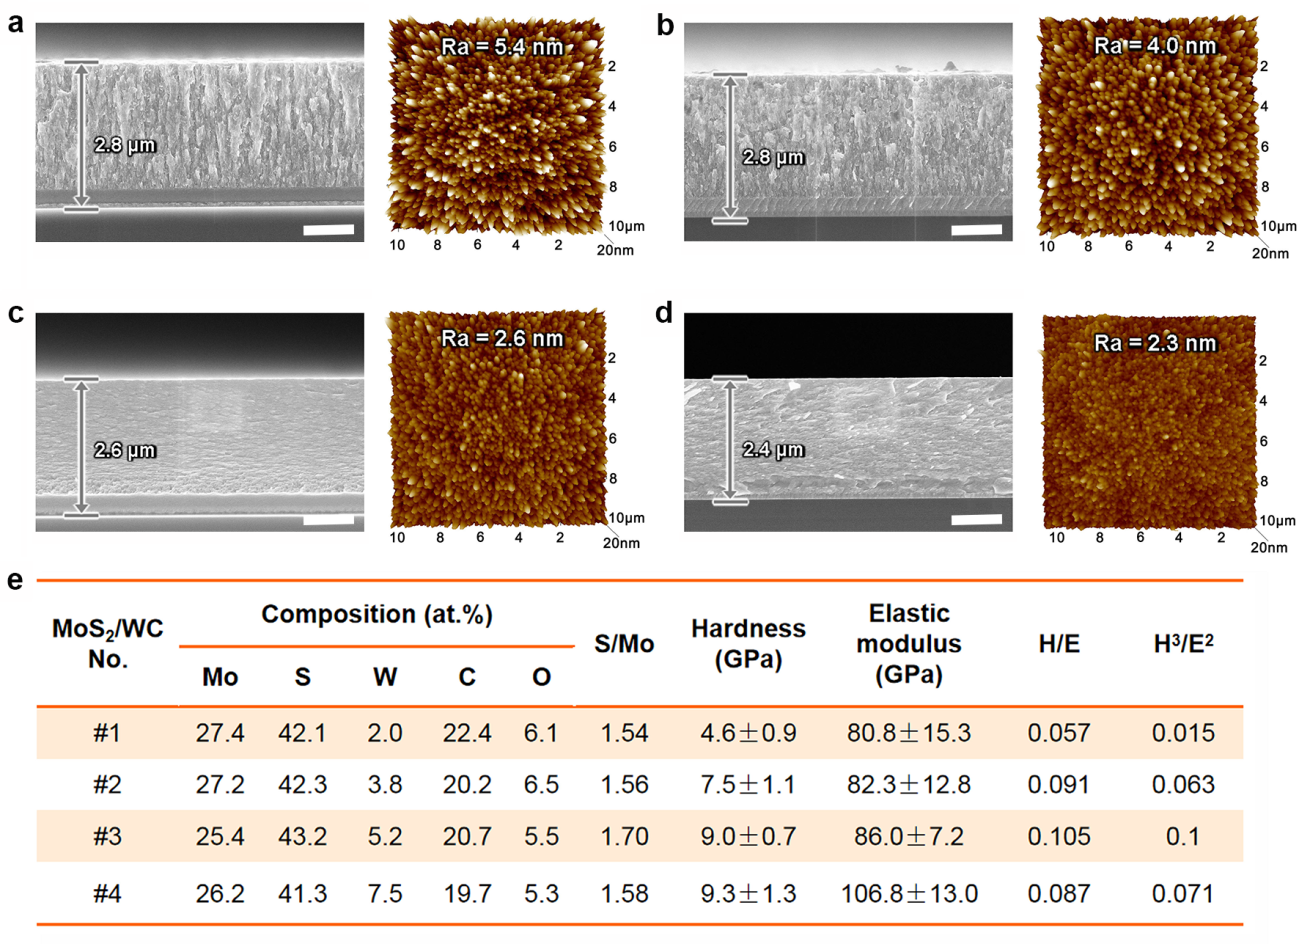


**Supplementary Figure 1 |** Morphologies and mechanical properties of the as-prepared MoS2/WC superlattice films grown on Si wafers. **a-d** The cross-sectional SEM images (left side) and the corresponding SPM three-dimensional morphological images (right side, with the size of 10 μm × 10 μm) of the as-prepared MoS2/WC superlattice films with different WC target currents: **a** 0.4 A, **b** 0.6 A, **c** 0.8 A, and **d** 1.0 A. Scale bars are 1.0 μm. **e** Elemental composition and mechanical properties involving hardness and elastic modulus of the as-prepared MoS2/WC superlattice films.


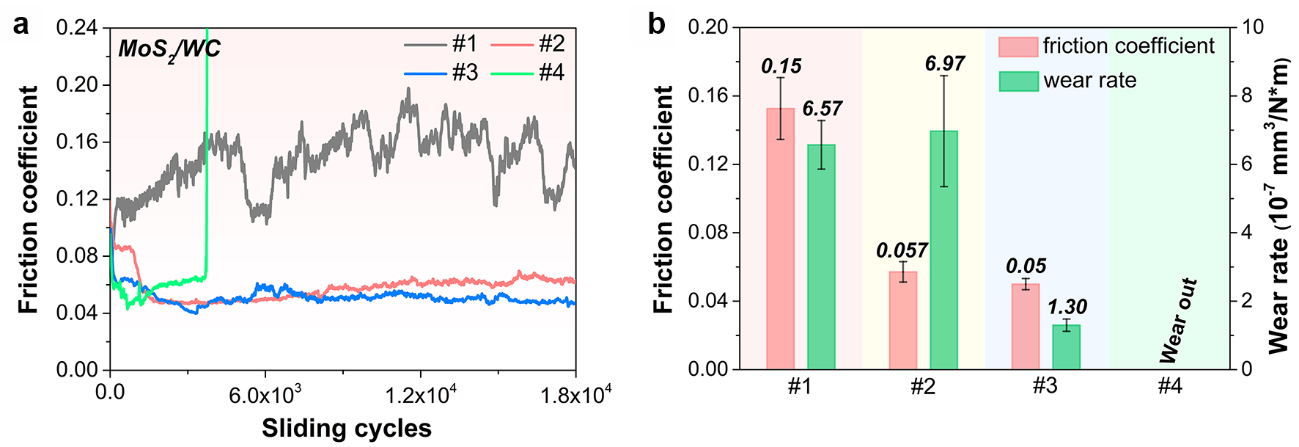


**Supplementary Figure 2 |** Tribological behavior of the as-prepared MoS2/WC superlattice films in air. **a** Sliding friction curves of the MoS2/WC superlattice films against steel ball in air. **b** Average friction coefficient and specific wear rate of the MoS2/WC superlattice films after 18,000 sliding cycles.

**
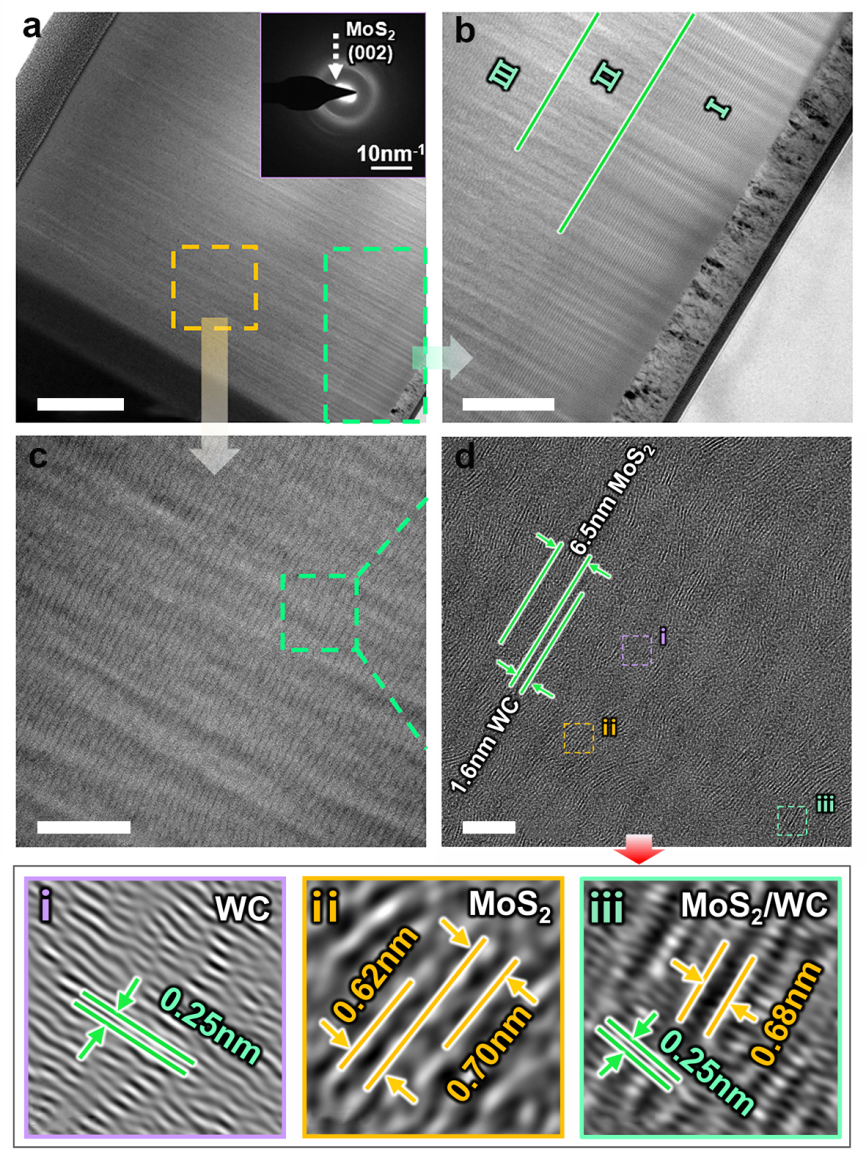
**

**Supplementary Figure 3 |** TEM characterization of the as-prepared MoS2/WC superlattice film on Si wafer. **a** Cross-sectional TEM image of MoS2/WC film. The inset selected area electron diffraction (SAED) pattern exhibits a bright diffraction spot of MoS2 (002) plane together with a weak ring, demonstrating that WC mainly exists in the form of amorphous-nanocrystalline. Scale bar: 500 nm. **b** A cross-sectional TEM micrograph showing the bulk MoS2/WC superlattice film includes a Ti adhesion layer (І), intermediate Ti/MoS2/WC layer (ІІ) and MoS2/WC nano-multilayer (ІІІ). Scale bar: 200 nm. **c** TEM micrograph obtained from the marked region in (**a**) showing a clear multilayer structure. Scale bar: 100 nm. **d** HRTEM image of the superlattice structure and corresponding inverse fast Fourier transform (FFT) patterns of the MoS2 and WC. The WC layer overall exhibits an amorphous feature with a few sparsely distributed nanocrystals, whereas MoS2 with the (002) plane aligned parallel to the substrate can be clearly observed. Scale bar: 10 nm.


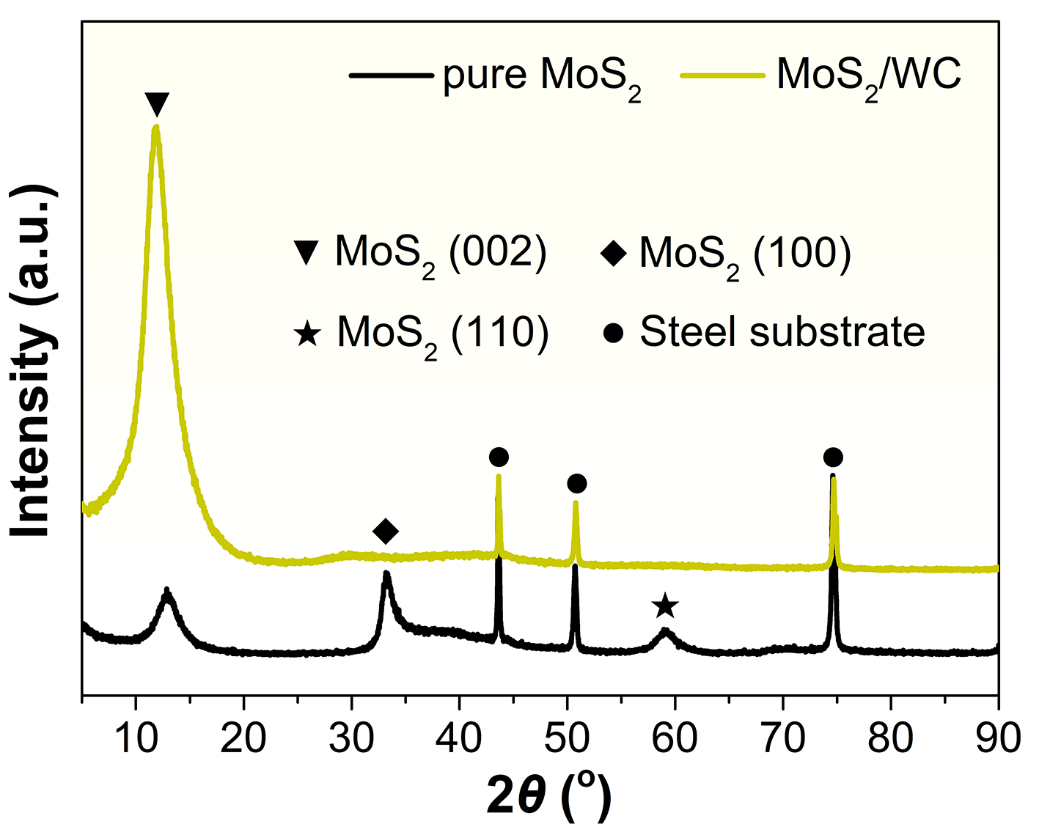


**Supplementary Figure 4 |** XRD patterns of the as-prepared pure MoS2 film and MoS2/WC superlattice film. Note that there are three peaks at around 13°, 33° and 59° of pure MoS2 film, which is assigned to (002), (100) and (110) planes, respectively. The MoS2/WC superlattice film only shows a strong diffraction peak of MoS2 (002) plane, confirming the thin WC sublayer causes the preferential growth of MoS2 with (002) plane.


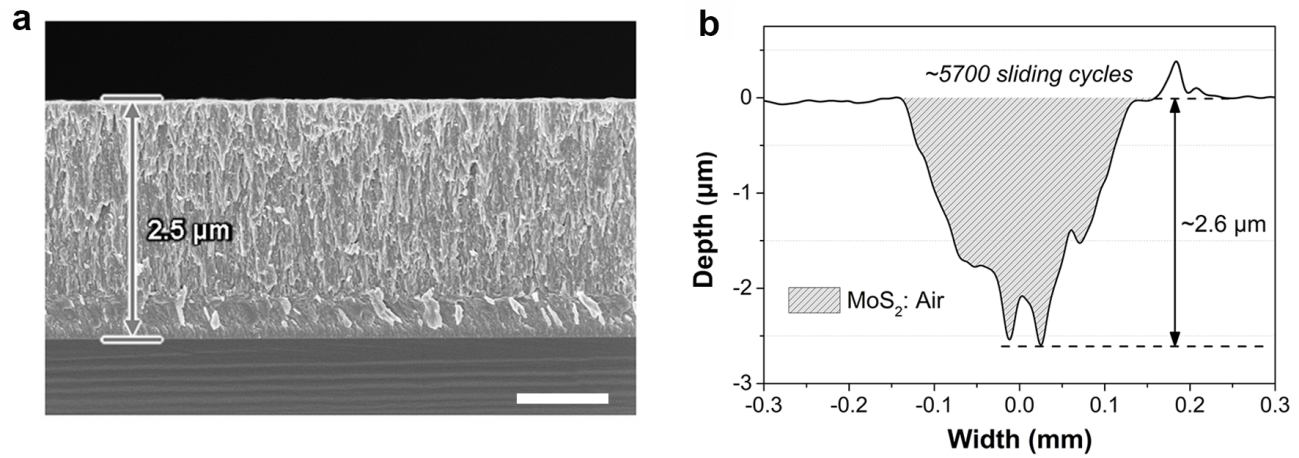


**Supplementary Figure 5 |** Cross-sectional morphology and wear depth plot of pure MoS2 film. **a** Cross-sectional SEM image of pure MoS2 film showing a typical columnar structure with a thickness of ~2.5 μm. Scale bar is 1.0 μm. **b** Representative cross-sectional wear depth plot of the wear track on pure MoS2 film after ~5700 sliding cycles in air.


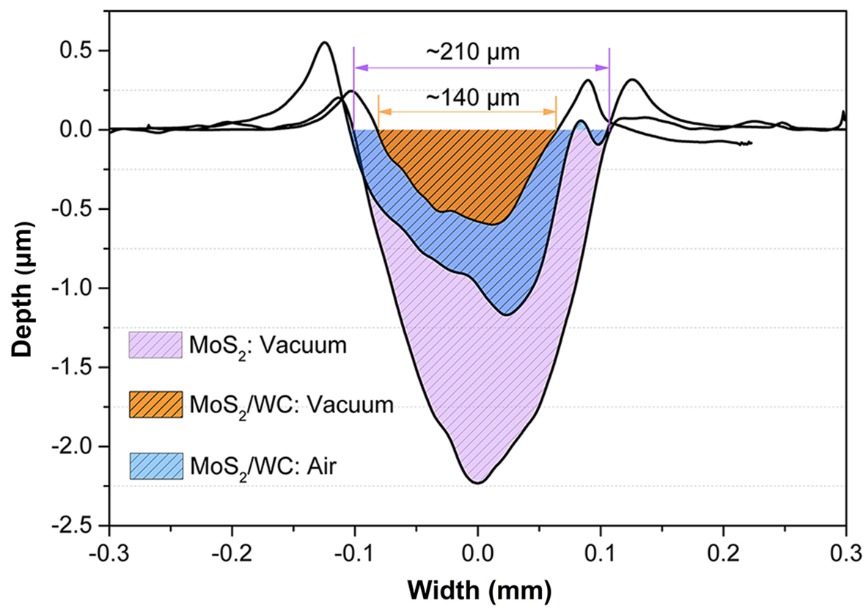


**Supplementary Figure 6 |** Representative cross-sectional wear depth plots of the wear tracks on pure MoS2 film and MoS2/WC superlattice film after 90,000 sliding cycles under different environments.


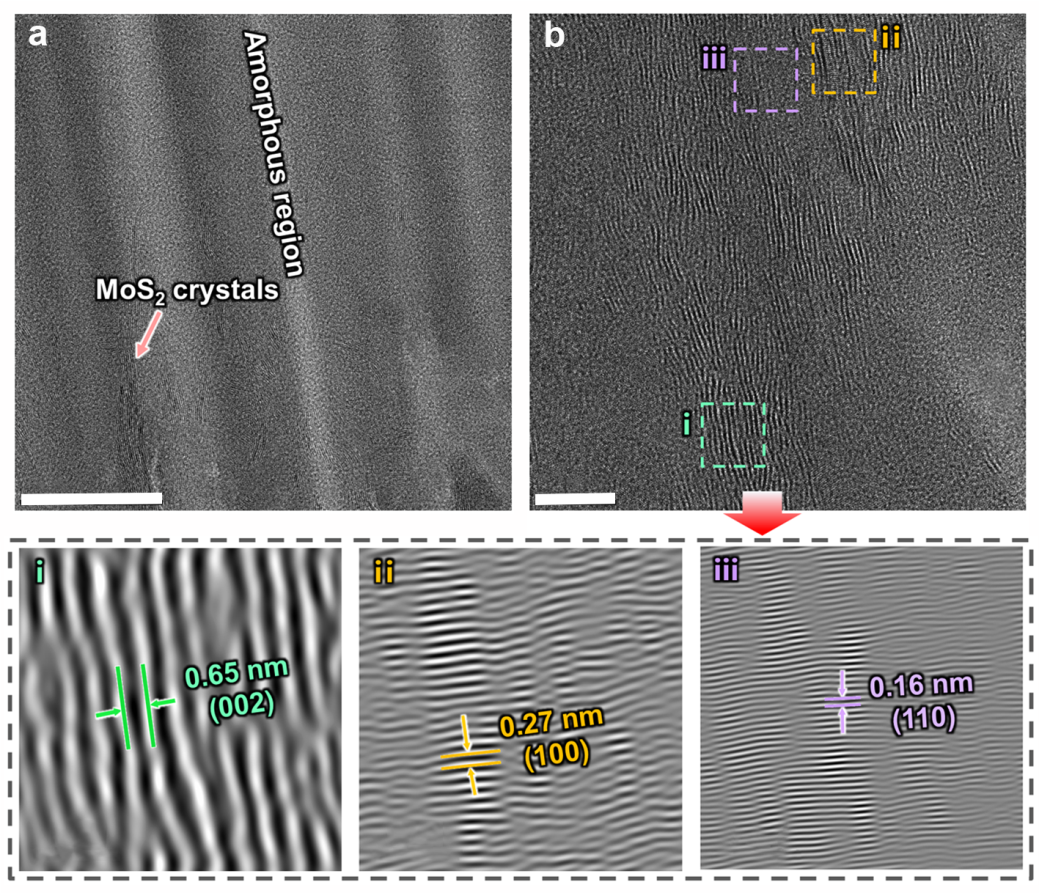


**Supplementary Figure 7 |** TEM characterization of the as-prepared pure MoS2 film on Si wafer. **a** Cross-sectional TEM image of pure MoS2 film shows that the film is composed of an amorphous matrix and a small amount of MoS2 crystals. Scale bar: 50 nm. **b** HRTEM image of pure MoS2 and corresponding selected area inverse FFT patterns. Scale bar: 10 nm. The lattice spacing of ~0.65, ~0.27 and ~0.16 nm corresponds to the (002), (100) and (110) crystal planes of MoS2, respectively, consistent with XRD results.


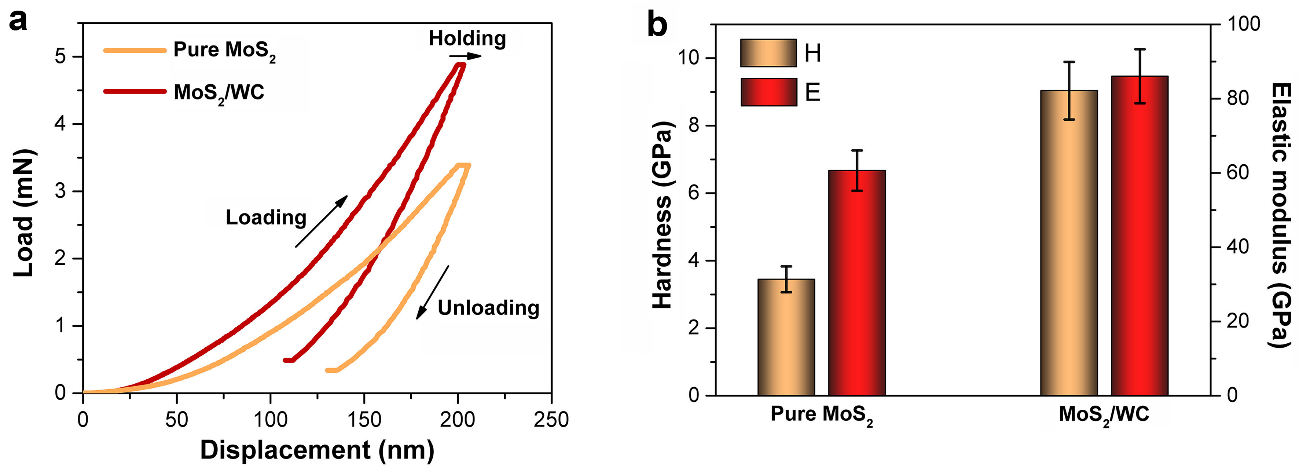


**Supplementary Figure 8 |** Comparison of mechanical properties between pure MoS2 and MoS2/WC superlattice films. **a** Load-displacement curves of pure MoS2 and MoS2/WC superlattice films. The applied load of the MoS2/WC superlattice film is much larger than that of pure MoS2 film at the same indentation depth (~200 nm), indicating that the MoS2/WC superlattice film has a greater deformation resistance than pure MoS2. **b** Hardness and elastic modulus of pure MoS2 and MoS2/WC superlattice films. The thin WC sublayer as a strengthening phase significantly improves the hardness (~9.0 GPa) of the superlattice film compared with pure MoS2 film (~3.4 GPa).


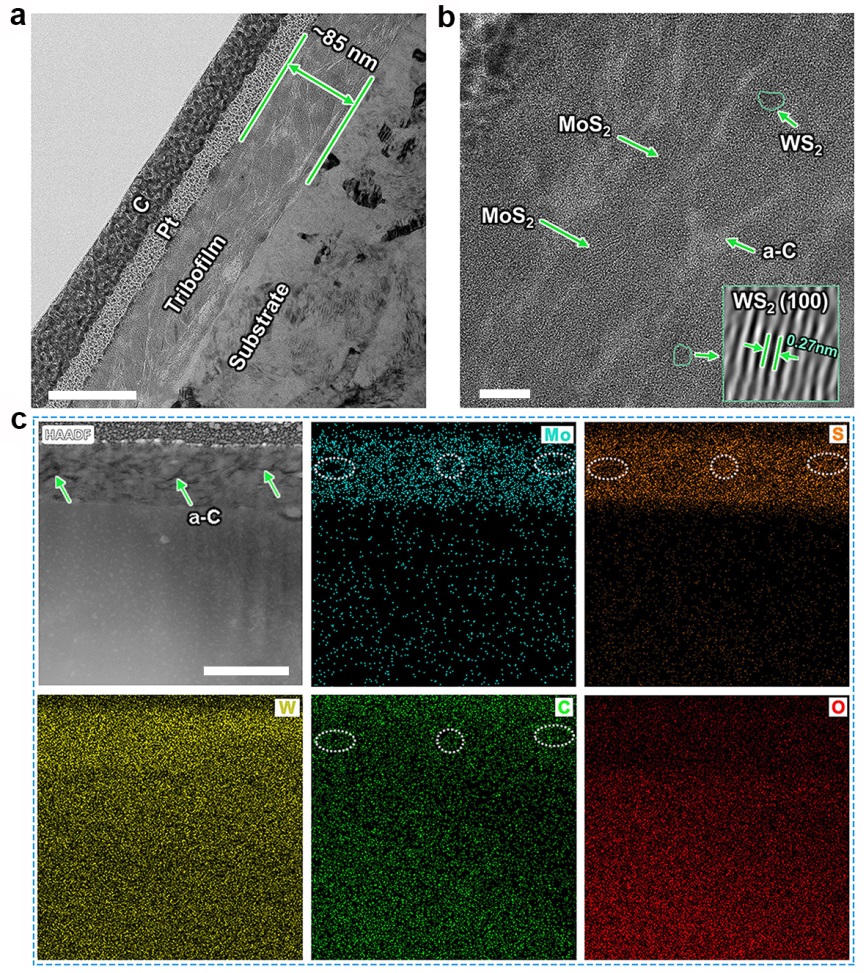


**Supplementary Figure 9 |** Low friction mechanism of MoS2/WC superlattice film in vacuum. **a** Low-magnification TEM image showing the cross-sectional morphology of the tribofilm on the ball wear scar after 90,000 sliding cycles in vacuum. Scale bar: 100 nm. **b** HRTEM image of the cross-sectional morphology showing MoS2 crystals and small amount of WS2 nanocrystallines are cross-linked with amorphous carbon (a-C). Scale bar: 10 nm. **c** STEM-HAADF image of the cross-sectional tribofilm and corresponding elemental maps of Mo, S, W, C, and O. Scale bar: 100 nm. The tribofilm is composed of the constituent elements of the film (Mo, S, W, C) and almost no oxygen, where the high signal of W element for the entire testing area may be related to the background interference. Clearly, the dark grey regions identified on the HAADF image indicate that these regions are absence of Mo element but enriched in S and C elements, implying the existence of C-S bonds.


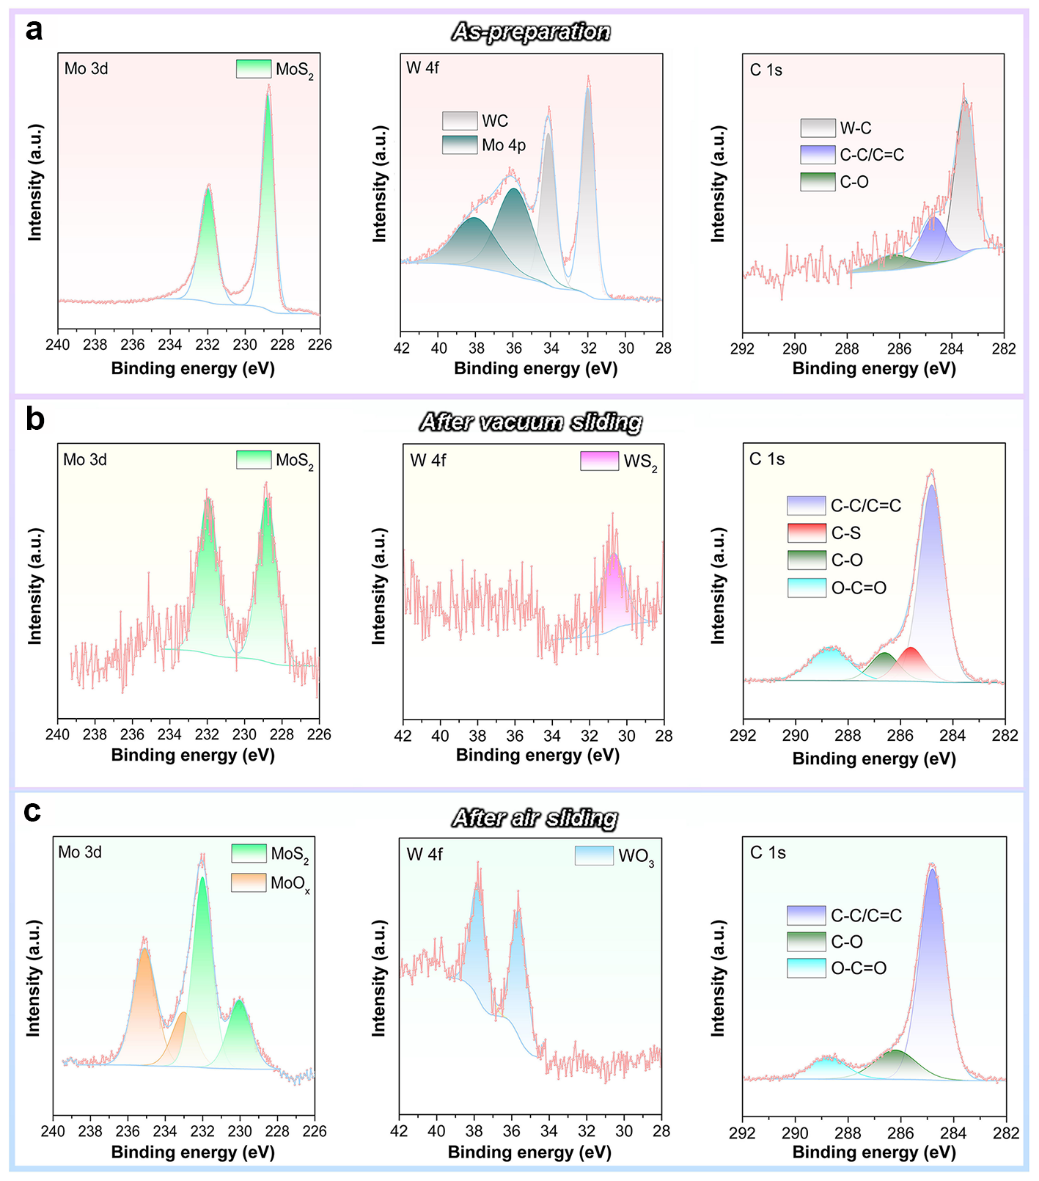


**Supplementary Figure 10 |** XPS characterization of MoS2/WC superlattice film before and after friction tests. **a** XPS spectra of Mo 3d, W 4f and C 1s for the as-prepared MoS2/WC superlattice film. **b, c** XPS spectra of Mo 3d, W 4f and C 1s obtained from the ball wear scars after 90,000 sliding cycles in (**b**) vacuum and (**c**) air. All the spectra are fitted with a non-linear least square fit program using Gauss-Lorentzian peak shapes.


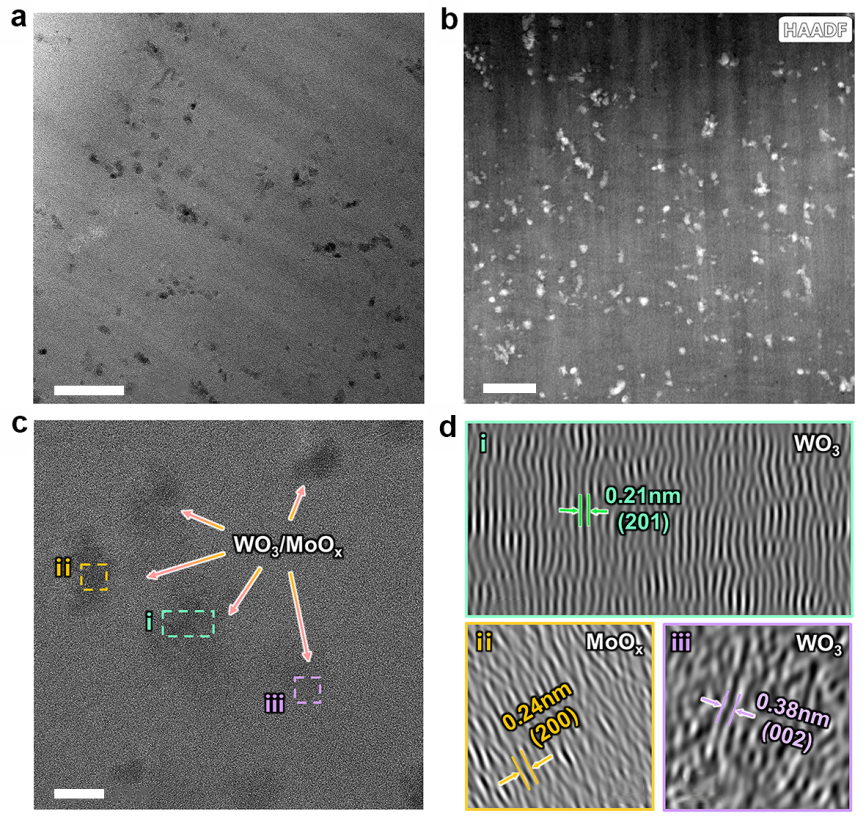


**Supplementary Figure 11 |** TEM characterization of the tribofilm for the MoS2/WC superlattice film against steel ball in air. **a** Low-magnification TEM image showing the cross-sectional morphology of tribofilm on the ball wear scar after 90,000 sliding cycles in air, where the tribofilm contains many black nanoparticles. **b** Corresponding STEM-HAADF image of the cross-sectional tribofilm. Scale bars in (**a**, **b**) are 100 nm. **c** Representative HRTEM image showing the tribofilm is mainly composed of amorphous matrix and randomly distributed MeOx nanoparticles. Scale bar: 10 nm. **d** Typical Fourier filtered images of the MeOx nanoparticles identified on the HRTEM image (**c**).


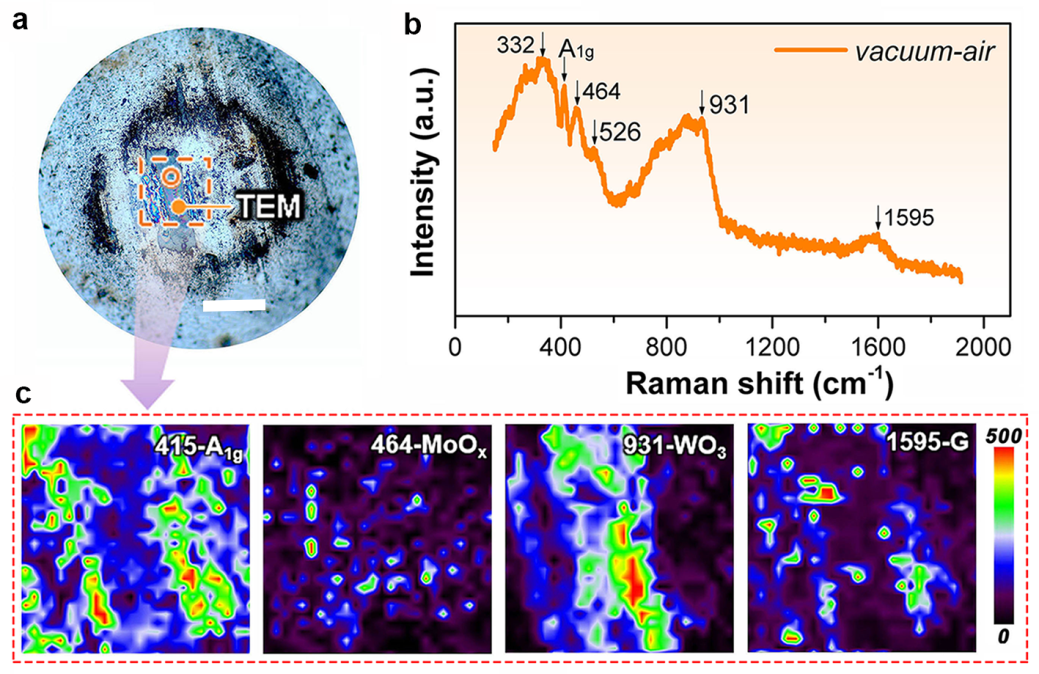


**Supplementary Figure 12 |** Tribofilm composition of MoS2/WC superlattice film in the superlubricity regime. **a** Optical image of the wear scar when friction test was interrupted at superlubric state of the third alternating period, where an alternating period includes 9,000 sliding cycles in vacuum and 9,000 sliding cycles in air. Scale bar: 100 μm. **b** Raman spectrum obtained from the point identified on the wear scar in (**a**). Raman analysis of the tribofilm shows three remarkable features including MoS2 (E2g1 and A1g modes, second-mode at 526 cm-1), metal oxides (MeOx, mentioned at 332, 464 and 931 cm-1) and a-C. **c** Raman intensity maps of A1g (~415 cm-1), MoOx (~464 cm-1), WO3 (~931 cm-1), and G (~1595 cm-1) peaks for the marked orange rectangle in (**a**).

**
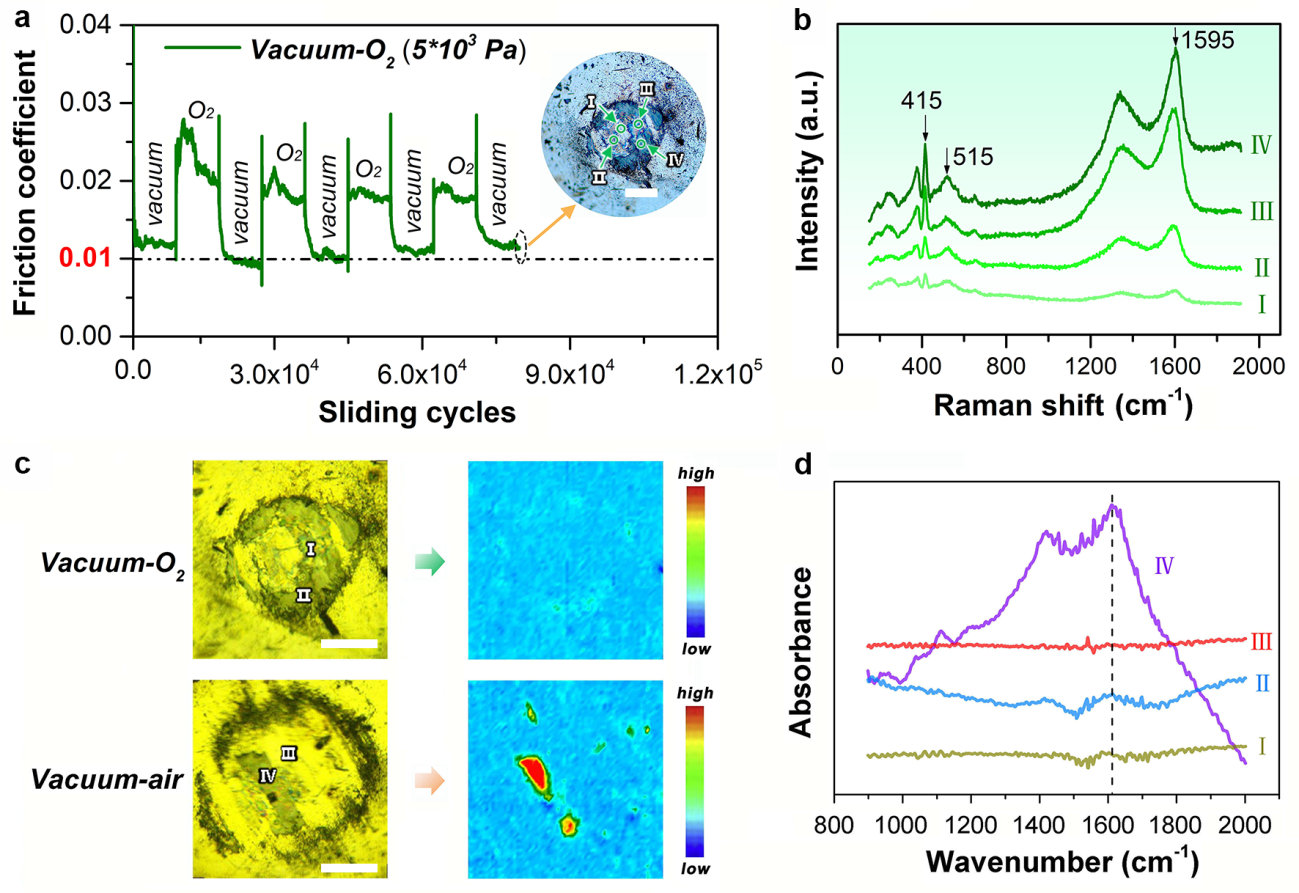
**

**Supplementary Figure 13 |** Effect of oxygen and water on the macroscale superlubricity of MoS2/WC superlattice film. **a** Friction curve for the MoS2/WC superlattice film in alternating vacuum-oxygen environment, where an alternating period includes 9,000 sliding cycles in vacuum and 9,000 sliding cycles in oxygen atmosphere. Inset optical image showing the wear scar when friction test was interrupted. Scale bar: 100 μm. **b** Raman spectra obtained from the points identified on the wear scar in (**a**). **c** IR absorption maps and **d** spectra of the wear scars after sliding in alternating vacuum-oxygen (fifth alternating period) and vacuum-air (third alternating period) environments. IR absorption maps over wavenumbers range from 1580 to 1700 cm-1, associated with O-H of H2O on the wear scar. Scale bars in (**c**) are 100 μm.





**Supplementary Figure 14 |** Comparison of surface profiles of the MoS2/WC superlattice film after 3,000 sliding cycles in air and 200,000 sliding cycles in alternating air-vacuum.


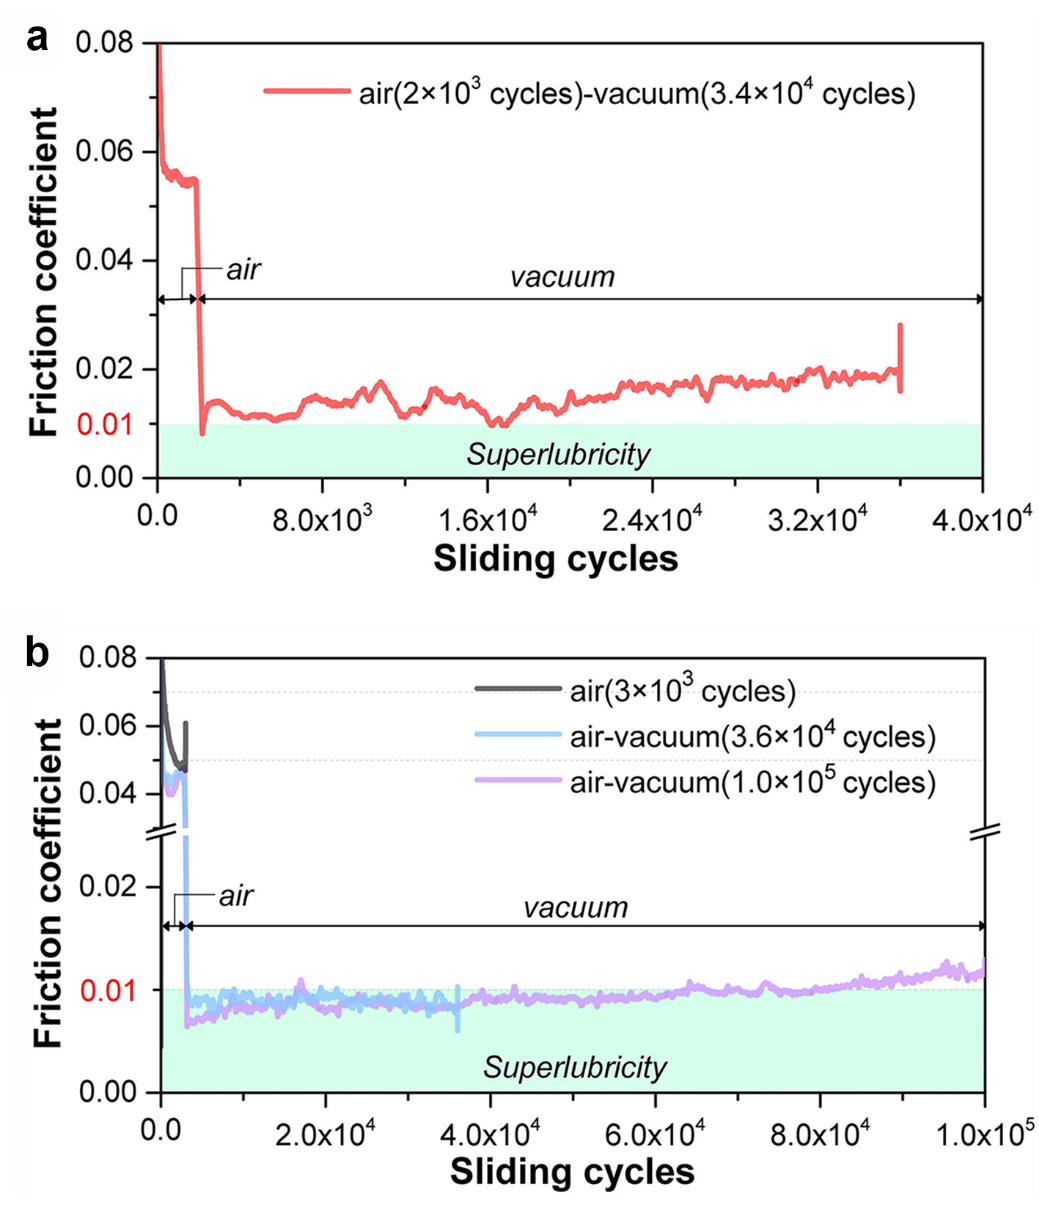


**Supplementary Figure 15 |** Robust superlubricity of MoS2/WC superlattice film. **a** Friction curve of MoS2/WC superlattice film sliding 2,000 cycles in air and then sliding 34,000 cycles in vacuum. **b** Friction curves of MoS2/WC superlattice film sliding 3,000 cycles in air and then sliding 33,000 cycles or 97,000 cycles in vacuum, respectively.

**Supplementary Tables**

**Supplementary Table 1.** Parameters for deposition process of MoS2/WC superlattice films.

| Grown films | MoS2 Target current (A) | WC Target current (A) | Deposition time (s) | | | Rotate speed  (rpm) |
| --- | --- | --- | --- | --- | --- | --- |
| Ti interlayer | Ti/MoS2/WC | MoS2/WC |
| MoS2/WC-*#1* | 1.6 | 0.4 | 1,200 | 1,800 | 8,000 | 2 |
| MoS2/WC-*#2* | 1.6 | 0.6 | 1,200 | 1,800 | 7,500 | 2 |
| MoS2/WC-*#3* | 1.6 | 0.8 | 1,200 | 1,800 | 7,000 | 2 |
| MoS2/WC-#4 | 1.6 | 1.0 | 1,200 | 1,800 | 6,500 | 2 |

**Supplementary Table 2.** Summary of MoS2-based films and their tribological properties.

| Sl# | Lubricant | Film  technique | Thickness  (μm) | Counterpart | Normal load/  Contact pressure | Sliding speed  (m/s) | Sliding cycle | Friction coefficient | Wear rate  (×10-7 mm3 N-1 m-1) | Test condition |
| --- | --- | --- | --- | --- | --- | --- | --- | --- | --- | --- |
| 1 | MoS2/Sb2O3/Au7 | Magnetron sputtering (MS) | ~1 | Si3N4  (Ф3.17 mm) | 98-980 mN  (0.3-1.1 GPa) | 0.0037 | 10,000 | 0.16 | 1.4 | Air |
| 2 | MoS2/Ti-W8 | MS | 3.1 | Al2O3  (Ф6 mm) | 1 N | 0.03 | 20,000 | 0.15 | 2.6 | Air |
| 3 | MoS2/Ti9 | MS | 1.85 | Cu ball  (Ф6 mm) | 5 N | 0.05 | 20,000 | ~0.14 | 6.5 | Air |
| 4 | MoS2/C/TiB210 | MS | **-** | 100Cr6  (~Ф4 mm) | 10 N  (1.86 GPa) | 0.1 | **-** | 0.10~0.14 | 2~16 | Air |
| 5 | MoS2/C11 | MS | 0.7~1.3 | GCr15  (Ф6 mm) | 5 N | 0.05 | 18,000 | ~0.08 | 2.2 | Air |
| 6 | MoS2/Nb12 | MS | ~3 | Al2O3  (Ф6 mm) | 5 N | 0.03 | 5,000 | 0.072 | 3.4 | Air |
| 7 | MoS2/Pb13 | MS | 2.0~2.5 | GCr15  (Ф4 mm) | 5 N | 0.05 | 10,000 | 0.07~0.10 | 2.3~3.3 | Air |
| 8 | MoSx/MoSx-Mo14 | MS | 1.2 | GCr15  (Ф3 mm) | 10 N | 0.15 | 21,000 | 0.06 | 4.5 | Air |
| 9 | MoS2/Pb-Ti15 | MS | 1.7 | GCr15  (Ф6 mm) | 5 N | 0.01 | 8,000 | 0.06 | 4.2 | Air |
| 10 | TiN/MoSx16 | MS | 1.5 | WC  (Ф3 mm) | 10 N | 0.2 | 28,662 | 0.05~0.06 | 5.5 | Air |
| 11 | MoS2/Au17 | Radio frequency sputtering | ~1 | Si3N4  (Ф3.17 mm) | 980 mN  (1.0 GPa) | 0.0037 | 1,000 | 0.05 | ~30 | Air |
| 12 | MoS2/W18 | MS | 2.08~2.33 | GCr15  (Ф6 mm) | 5 N | 0.05 | 1,800 | 0.05 | 5 | Air |
| 13 | MoS2/a-C:H19 | MS | 1.8~2.0 | GCr15  (Ф6 mm) | 5 N  (1.0 GPa) | 0.2 | 3.0×105 | 0.019 | 2.5 | Vacuum |
| 14 | MoS2/WS220 | MS | ~8 | AISI 440C  (Ф8 mm) | 5 N | 0.785 | 60,000 | 0.03 | 27 | Vacuum |
| 15 | MoS2/C-Ti21 | MS | ~2.5 | GCr15  (Ф6 mm) | 5 N | 0.05 | 20,000 | 0.03 | 1.64 | Vacuum |
| 0.11 | 4.65 | Air |
| 16 | Mo-S-N22 | MS | 4~6 | GCr15  (Ф3mm) | 3 N  (1.5 GPa) | 0.314 | 1.8×105 | 0.05 | 5.54 | Vacuum |
| 17 | MoS2/WC (*this work*) | MS | 2.6 | GCr15  (Ф6 mm) | 5 N  (1.0 GPa) | 0.05 | 90,000 | 0.013 | 0.6 | Vacuum |
| 0.047 | 1.3 | Air |

**Supplementary Note 1**

**Morphologies and mechanical properties of as-prepared MoS2/WC films.** The WC target current is a key parameter to affect the surface and cross-sectional morphologies, roughness, mechanical and tribological properties of the films. The cross-sectional SEM images (Supplementary Fig. 1a-d) demonstrate that a pronounced columnar structure with sharp inter-columnar boundaries is visible for the MoS2/WC superlattice films with low WC target current (e.g., MoS2/WC-#1). This coarse columnar structure will be transformed to a fine-grained structure with the increase of the WC target current, which is ascribed to the formation of a clear multilayer structure between the MoS2 and WC layers. The heterogeneous interface can significantly hinder the growth of columnar crystal and make the film structure more compact, leading to a featureless cross-sectional morphology1. From the surface topography images, the film roughness decreases with the increase of WC target current, that is, it decreases from 5.4 nm of MoS2/WC-#1 to 2.3 nm of MoS2/WC-#4.

The elemental composition and mechanical properties of the as-prepared films are presented in Supplementary Fig. 1e. The chemical composition of the films is measured by EDS from the cross-sections. The content of W increases to 7.5 at.% when the WC target current rises to 1.0 A, while the content of C in films has almost no clear relationship with the WC target current due to the carbon contamination coming from the ambient air or the residual gas during the sputtering process2. The corresponding S/Mo ratio of the as-prepared films is less than stoichiometric value, in the range of 1.43 to 1.70, because S is more likely to be sputtered from the surface than Mo during the film deposition. More importantly, the superior S/Mo ratio is achieved with a WC target current at 0.8 A, indicating less defects of MoS2 crystal structure.

The hardness and elastic modulus measurements are performed on the steel substrates coated with MoS2/WC superlattice films, where the maximum indentation depth is around 200 nm and less than 10% of film thickness. It can be seen that the hardness of the films increases from ~4.6 GPa of MoS2/WC-#1 to ~9.3 GPa of MoS2/WC-#4, and the corresponding elastic modulus also increases from ~80.8 GPa to ~106.8 GPa. The lower mechanical property of MoS2/WC-#1 film is related to its columnar structure with large crystallites that is not strongly bonded with each other. On the other hand, a thinner WC layer will cause an unclear heterogeneous interface, and the difference in shear modulus between MoS2 and WC layers becomes smaller, thereby leading to the decrease in the hardness and elastic modulus of bulk film3. If the thickness of WC layer decreases to a certain value, the film will be transformed from multilayer structure to composite structure (interface strengthening disappears), causing a significant decrease in film hardness. In contrast, as the WC target current increases, the content of hard ceramic phase within film increases; at the same time, a relatively thick WC layer serving as a heterogeneous layer can block the growth of MoS2 columnar crystals and finally form a dense film structure. Therefore, the presence of hard reinforcing phase and the improved densification structure are responsible for the enhancement in hardness and elastic modulus of films4.

The H/E and H3/E2 ratios are two suitable indicators which can control the resistance of materials to elastic and plastic deformation rather than pursuing the ultra-high hardness5,6. In general, the films with high H/E and H3/E2 ratios indicate better comprehensive mechanical properties, showing excellent resistance to wear, impact, and abrasion. It is clearly observed that the H3/E2 ratio is more sensitive to the WC target current than H/E, and both of them reach an optimal value when the WC target current is 0.8 A.

**Tribological behavior of MoS2/WC superlattice films.** The steel substrates coated with MoS2/WC superlattice films were driven to slide against steel ball (Ф6 mm) in linear reciprocating mode at 5 N and 5 Hz in air with relative humidity of ~40%. As shown in Supplementary Fig. 2, the MoS2/WC-#1 exhibits a high and fluctuant friction coefficient during the whole test and the corresponding average friction coefficient is ~0.15, resulting from the typical columnar structure and poor oxidation resistance. With the increase of WC target current, the densification and resistance to moisture of the films are improved significantly, showing a low and stable friction coefficient. For example, the average friction coefficient and specific wear rate of MoS2/WC-#3 are ~0.05 and 1.3 × 10-7 mm3 N-1 m-1, respectively. When the WC target current rises to 1.0 A, the film only maintains a short lifetime (~3800 cycles). This sharp difference in frictional performance between MoS2/WC-#3 and #4 films is mainly related to the significant increase in the elastic modulus of MoS2/WC-#4 causing the film to become brittle and easy to delamination under high contact stress. As mentioned above, the comparative experiments of MoS2/WC superlattice films show that the optimum WC target current is 0.8 A. Thus we will focus on the ultralow friction and wear mechanisms of the MoS2/WC-#3 superlattice film in different environments in the following discussion.

**Supplementary Note 2**

**Environmentally adaptive behavior of MoS2/WC superlattice film.** A comparison of the average friction coefficient and specific wear rate (volume of the material removed per unit load and per unit sliding distance) of the MoS2/WC superlattice film to state-of-the-art MoS2-based composite and multilayer films is presented in Supplementary Table 27-22, where most of the compared films are prepared by magnetron sputtering to deposit high-quality and well-adhered films with low friction and high wear resistance. Importantly, although many composites and multilayer designs can improve the tribological behavior of MoS2 for specific environments, the remarkably low friction and wear rates of MoS2/WC superlattice film are observed in both air and vacuum environments, confirming the environmental robustness of the MoS2/WC superlattice film.

**Chemical configurations of as-prepared films and tribofilms****.** XPS was employed to investigate the elemental bonding of the as-prepared MoS2/WC superlattice film and the tribofilm on steel ball after 90,000 sliding cycles in vacuum and air. To eliminate surface contamination, the surface of freshly prepared sample was etched by using Ar ion beam with a 4 keV voltage for 5 min. As shown in Supplementary Fig. 10a, the as-prepared sample shows two distinct peaks at a binding energy of 228.8 and 231.9 eV corresponding to Mo 3d5/2 and Mo 3d3/2 in MoS24. The contributions located at 32.0 eV (W 4f7/2) and 34.1 eV (W 4f5/2) are due to the presence of W-C bonds, whereas the doublet peaks located at 36.0 eV and 38.1 eV belong to Mo 4p18,23. High resolution C 1s spectrum can be fitted with three component peaks at 283.5, 284.7 and 286.4 eV, typically assigned to the W-C, C-C/C=C and C-O functional groups, respectively24. Both W 4f and C 1s spectra confirm the presence of WC phase in the as-prepared film. After 90,000 sliding cycles in vacuum (Supplementary Fig. 10b), the spectrum of Mo 3d collected from the tribofilm is almost unchanged compared with the as-prepared sample. No W-O and W-C bonds are detected on the surface of tribofilm. This indicates that WC phase in the film is transformed into WS2 by tribochemical reaction and then transferred to the ball surface, which can be verified from W 4f spectrum and the disappearance of W-C group in the C 1s spectrum. In addition to the C-C/C=C and C-O functional groups, the formation of C-S group in the C 1s spectrum suggests the partly sulfureted carbon-based network in the tribofilm. With the incorporation of S into the carbon network, the dangling bonds at sp2 cluster boundaries can be terminated, which is expected to reduce adhesion and friction in vacuum25. When the MoS2/WC superlattice film experiences 90,000 sliding cycles in air (RH 40%), part of the MoS2 phase in the tribofilm is oxidized due to the tribochemical reaction between MoS2 and chemical species in the atmosphere (Supplementary Fig. 10c). The contributions located at 233.0 and 235.0 eV in Mo 3d spectrum are assigned to MoOx15. Meanwhile, the ultrathin WC layer is also completely oxidized to WO3, where the doublet peaks located at 35.6 eV (W 4f7/2) and 37.8 eV (W 4f5/2) are assigned to WO323, thereby forming a MeOx/MoS2 sliding interface in air.

**Supplementary Note 3**

**Superlubricity mechanisms of MoS2/WC superlattice film.** To clarify the mechanisms underlying the superlubricity of the MoS2/WC superlattice film for macroscale contacts, the MoS2/WC-steel rubbing system at the superlubricity regime was characterized by Raman spectroscopy. A stable superlubricity can be achieved in the vacuum stage of the third period (Fig. 3a). Both the Raman spectrum and maps identified on the wear scar in Supplementary Fig. 12a exhibit a high Raman intensity of MeOx in the tribofilm and the MeOx is surrounded by MoS2 and a-C (Supplementary Fig. 12b, c), indicating that the friction-induced a-C phase is continuously transferred into the tribofilm with the continuous consumption of MeOx phase in vacuum.

To determine what is promoting the formation of the MeOx phase in the tribofilm, we carried out a friction experiment for a MoS2/WC-steel system in alternating vacuum-oxygen atmosphere (oxygen pressure: 5×103 Pa), where the environment was cycled back and forth between the two conditions every 9,000 sliding cycles and the initial stage was vacuum (Supplementary Fig. 13a). However, the friction coefficient in the vacuum stage does not drop below 0.01 as initially expected, and its value in the oxygen stage maintains at roughly 0.02. In an oxidizing atmosphere, the oxygen will absorb on the edges of the MoS2 crystallites and then disrupt the crystal orientation of the MoS2 flakes, leading to a slightly higher friction coefficient than in vacuum, similar to a previous report26. Corresponding Raman spectra obtained from four different points identified on the wear scar (inset optical image in Supplementary Fig. 13a) show that there is no characteristic peak of oxides detected from the tribofilm (Supplementary Fig. 13b). Instead, the tribofilm only exhibits the characteristic peaks of MoS2, WS2 and a-C, consistent with the observations from the tests run for 90,000 sliding cycles in vacuum (Fig. 2b). From the results of FTIR microscopic maps and spectra (Supplementary Fig. 13c, d), there are almost no -OH bonds in the tribofilm after sliding four periods in alternating vacuum-oxygen atmosphere. However, a large number of -OH bonds exist in the MeOx-enriched tribofilm after sliding only two periods in alternating vacuum-air, suggesting that water is the key factor to promote the formation of MeOx, rather than just the role of oxygen.

**Robust superlubricity of MoS2/WC superlattice film.** From our clear understanding of the macroscale superlubricity to sputtered films, if the MoS2/WC superlattice film can establish a stable MoS2/MeOx sliding interface after very short friction tests in air, a robust macroscale superlubricity can be achieved in vacuum. Based on this assumption, we run a friction test with the MoS2/WC-steel system for around 2,000~3,000 sliding cycles in air, and then perform a long-term friction experiment in vacuum. After 2,000 sliding cycles in air, it is difficult to form a continuous and stable tribofilm containing MeOx on the ball surface, leading to a high friction coefficient (above 0.01) in the following 34,000 sliding cycles in vacuum (Supplementary Fig. 15a). In contrast, when the MoS2/WC-steel system experiences 3,000 sliding cycles in air, its friction coefficient remains superlubricous state in vacuum for the subsequent ~80,000 sliding cycles (Supplementary Fig. 15b). This result is attributed to the formation of stable MoS2/MeOx sliding interface in a short-term air friction.

**References**

1. He, D.et al*.* Simultaneously achieving superior mechanical and tribological properties in WC/a-C nanomultilayers via structural design and interfacial optimization. *J. Alloys Compd.* **698**, 420-432 (2017).

2. Martin, J. M., Donnet, C., Le Mogne, T. & Epicier, T. Superlubricity of molybdenum disulphide. *Phys. Rev. B* **48**, 10583-10586 (1993).

3. Li, H.et al*.* Structure and tribological behavior of Pb-Ti/MoS2 nanoscaled multilayer films deposited by magnetron sputtering method. *Appl. Surf. Sci.* **435**, 48-54 (2018).

4. Ren, S., Li, H., Cui, M., Wang, L. & Pu, J. Functional regulation of Pb-Ti/MoS2 composite coatings for environmentally adaptive solid lubrication. *Appl. Surf. Sci.* **401**, 362-372 (2017).

5. Musil, J. Hard and superhard nanocomposite coatings. *Surf. Coat. Technol.* **125**, 322–330 (2000).

6. Leyland, A. & Matthews, A. On the significance of the H/E ratio in wear control: a nanocomposite coating approach to optimised tribological behaviour. *Wear* **246**, 1-11 (2000).

7. Scharf, T. W., Kotula, P. G. & Prasad, S. V. Friction and wear mechanisms in MoS2/Sb2O3/Au nanocomposite coatings. *Acta Mater.* **58**, 4100-4109 (2010).

8. Moskalewicz, T., Zimowski, S., Wendler, B., Nolbrzak, P. & Czyrska-Filemonowicz, A. Microstructure and tribological properties of low-friction composite MoS2(Ti,W) coating on the oxygen hardened Ti-6Al-4V alloy. *Met. Mater. Int.* **20**, 269-276 (2014).

9. Wang, P., Yue, W., Lu, Z., Zhang, G. & Zhu, L. Friction and wear properties of MoS2-based coatings sliding against Cu and Al under electric current. *Tribol. Int.* **127**, 379-388 (2018).

10. Steinmann, M., Müller, A. & Meerkamm, H. A new type of tribological coating for machine elements based on carbon, molybdenum disulphide and titanium diboride. *Tribol. Int.* **37**, 879-885 (2004).

11. Gu, L., Ke, P., Zou, Y., Li, X. & Wang, A. Amorphous self-lubricant MoS2-C sputtered coating with high hardness. *Appl. Surf. Sci.* **331**, 66-71 (2015).

12. Arslan, E., Totik, Y., Bayrak, O., Efeoglu, I. & Celik, A. High temperature friction and wear behavior of MoS2/Nb coating in ambient air. *J. Coat. Technol. Res.* **7**, 131-137 (2009).

13. Li, H., Zhang, G. & Wang, L. Low humidity-sensitivity of MoS2/Pb nanocomposite coatings. *Wear* **350-351**, 1-9 (2016).

14. Chen, L. M., Tu, J. P., Zhang, S. C., Peng, S. M. & Gu, B. Effect of deposition pressure on microstructure and tribological behavior of MoSx/MoSx-Mo nanoscale multi-layer films. *Tribol. Lett.* **25**, 87-91 (2007).

15. Ren, S.et al*.* Structural design of MoS2-based coatings toward high humidity and wide temperature. *J. Mater. Sci.* **54**, 11889-11902 (2019).

16. Gangopadhyay, S., Acharya, R., Chattopadhyay, A. K. & Paul, S. Composition and structure–property relationship of low friction, wear resistant TiN–MoSx composite coating deposited by pulsed closed-field unbalanced magnetron sputtering. *Surf. Coat. Technol.* **203**, 1565-1572 (2009).

17. Scharf, T. W., Goeke, R. S., Kotula, P. G. & Prasad, S. V. Synthesis of Au-MoS2 nanocomposites: thermal and friction-induced changes to the structure. *ACS Appl. Mater. Interfaces* **5**, 11762-11767 (2013).

18. Zeng, C.et al*.* Study on atmospheric tribology performance of MoS2–W films with self-adaption to temperature. *Ceram. Int.* **45**, 15834-15842 (2019).

19. Wu, Y. et al*.* A long-lifetime MoS2/a-C:H nanoscale multilayer film with extremely low internal stress. *Surf. Coat. Technol.* **236**, 438-443 (2013).

20. Gao, X.et al*.* Constructing WS2/MoS2 nano-scale multilayer film and understanding its positive response to space environment. *Surf. Coat. Technol.* **353**, 8-17 (2018).

21. Li, L.et al*.* The superlattice structure and self-adaptive performance of C–Ti/MoS2 composite coatings. *Ceram. Int.* **46**, 5733-5744 (2020).

22. Zhang, X.et al*.* Carbon and nitrogen co-doping self-assembled MoS2 multilayer films. *Appl. Surf. Sci.* **406**, 30-38 (2017).

23. Abad, M. D., Muñoz-Márquez, M. A., El Mrabet, S., Justo, A. & Sánchez-López, J. C. Tailored synthesis of nanostructured WC/a-C coatings by dual magnetron sputtering. *Surf. Coat. Technol.* **204**, 3490-3500 (2010).

24. Hakansson, K. L., Johansson, H. I. & Johansson, L. I. High-resolution core-level study of hexagonal WC(0001). *Phys. Rev. B* **49**, 2035-2039 (1994).

25. Wang, F., Wang, L. & Xue, Q. Fluorine and sulfur co-doped amorphous carbon films to achieve ultra-low friction under high vacuum. *Carbon* **96**, 411-420 (2016).

26. Serpini, E. et al*.* The role of humidity and oxygen on MoS2 thin films deposited by RF PVD magnetron sputtering. *Surf. Coat. Technol.* **319**, 345-352 (2017).
